# Supplementary material for: The effect of Omicron breakthrough infection and extended BNT162b2 booster dosing on neutralization breadth against SARS-CoV-2 variants of concern
Source: bioRxiv or medRxiv preprint supplement (doi:10.1101/2022.08.04.22278160), 2022-08-05

## Supplemental information

### Extended BNT162b2 booster dosing generates a broader neutralizing antibody response against SARS-CoV-2 variants of concern

Carl Graham<sup>1\*</sup>, Thomas Lechmere<sup>1\*</sup>, Aisha Rehman<sup>1</sup>, Jeffrey Seow<sup>1</sup>, Ashwini Kurshan<sup>1</sup>, Isabella Huettner<sup>1</sup>, Thomas J.A. Maguire<sup>1</sup>, Jerry Tam<sup>1</sup>, Daniel Cox<sup>1</sup>, Christopher Ward<sup>1</sup>, Mariusz Racz<sup>2</sup>, Anele Waters<sup>2</sup>, Christine Mant<sup>3</sup>, Michael H. Malim<sup>1</sup>, Julie Fox<sup>1</sup>, Katie J. Doores<sup>1#</sup>

<sup>1</sup> Department of Infectious Diseases, School of Immunology & Microbial Sciences, King's College London, London, UK.

<sup>2</sup> Harrison Wing, Guys and St Thomas' NHS Trust, London, UK.

<sup>3</sup> Infectious Diseases Biobank, Department of Infectious Diseases, School of Immunology and Microbial Sciences, King's College London, London, UK.

\* These authors contributed equally

# Corresponding author: [katie.doores@kcl.ac.uk](mailto:katie.doores@kcl.ac.uk)

#### **Supplementary Figure S1: SARS-CoV-2 Spike-reactive memory B cells measured**

**before and after vaccination. A)** Example FACS gating for pre-vaccination sample (visit 1) and from post-vaccination sample (visit 3) from SARS-CoV-2 naïve individual. **B)** Frequency of memory B cells in the total B cell population at visit 1 and visit 3 for matched donors.

**a**

VA005 visit 1

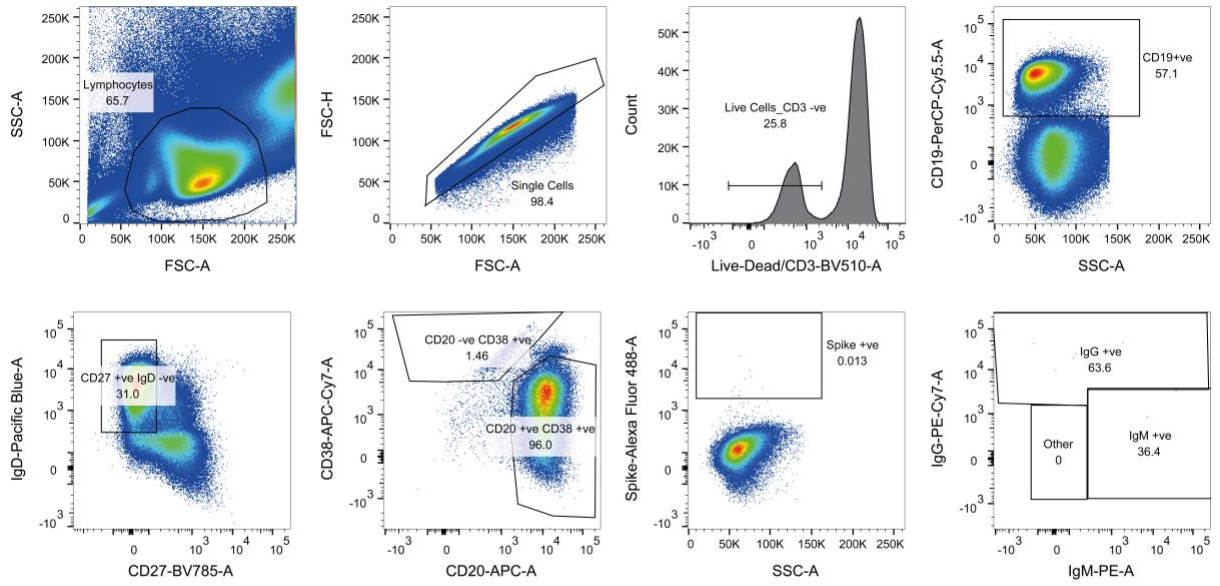

VA005 visit 3

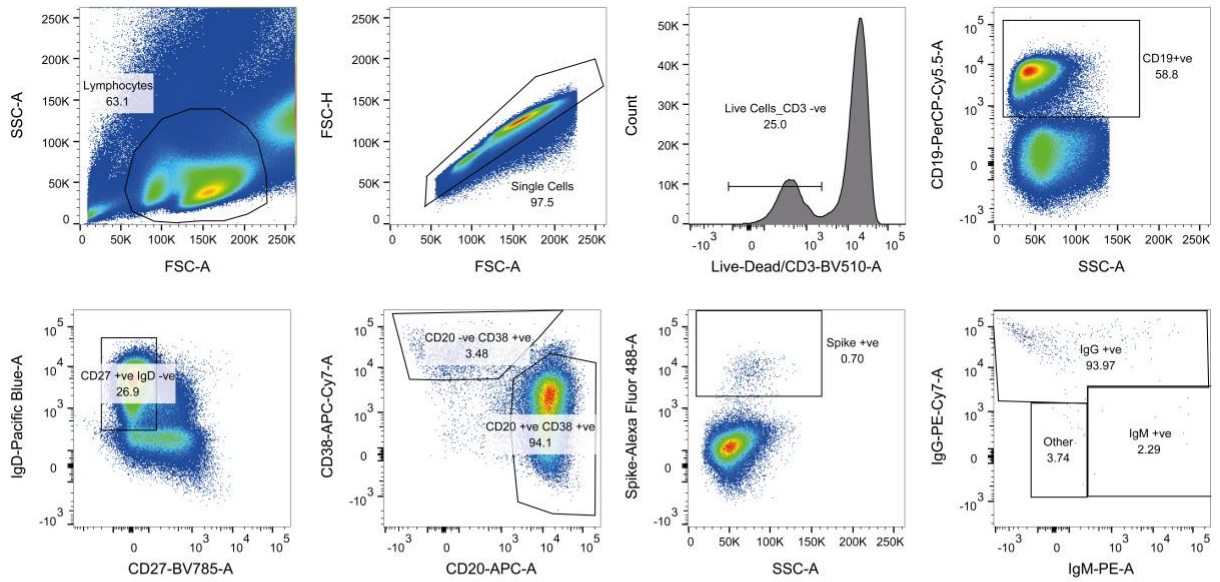

**b**

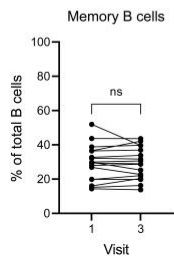

Supplement: Supplementary file [file media-1.pdf]
